# Supplementary material
Source: MDPI journal article supplement (https://www.mdpi.com/1996-1073/16/7/3048)
Supplement: s1 [file s1]

## Supplementary data

### 1. Materials hygrothermal properties

In Table S1 and Table S2, it can be seen the set of parameters, and respective results, that were used to characterise the constructive solutions that were evaluated in terms of their hygrothermal behaviour through simulation.

**Table S1.** Thermal insulation materials' properties

| Property                                                                | TR<br>reference           | TR<br>aramid | TR<br>sisal | TR<br>biomass | Ind thermal<br>render<br>[1,2] | EPS<br>[3,4] | XPS<br>[4,5] |
|-------------------------------------------------------------------------|---------------------------|--------------|-------------|---------------|--------------------------------|--------------|--------------|
| $\rho_{\text{hard}}$ [kg m <sup>-3</sup> ]                              | 158.7                     | 164.5        | 160.3       | 161.6         | 208.7                          | 15           | 40           |
| P <sub>0</sub> [%]                                                      | 86.3                      | 85.1         | 86.9        | 87.0          | 34.7                           | 95.0         | 95.0         |
| c <sub>p</sub> [J kg <sup>-1</sup> K <sup>-1</sup> ]                    | 930.1                     | 800.0        | 894.5       | 957.3         | 1000                           | 1500         | 1500         |
| $\lambda_{10^{\circ}\text{C,dry}}$ [W m <sup>-1</sup> K <sup>-1</sup> ] | 0.0293                    | 0.0315       | 0.0298      | 0.0306        | 0.049                          | 0.036        | 0.030        |
| $\mu$ [-]                                                               | 13.7                      | 13.3         | 12.7        | 12.4          | 11.7                           | 30           | 100          |
| w <sub>80</sub> [kg m <sup>-3</sup> ]                                   | 7.8                       | 7.1          | 7.2         | 7.5           | 1.3                            | -            | -            |
| w <sub>f</sub> [kg m <sup>-3</sup> ]                                    | 281.0                     | 246.0        | 260.2       | 274.8         | 346.5                          | -            | -            |
| A <sub>w</sub> [kg m <sup>2</sup> s <sup>-1/2</sup> ]                   | 0.1090                    | 0.0286       | 0.0325      | 0.0310        | 0.0296                         | -            | -            |
| $\lambda_w$ [W m <sup>-1</sup> K <sup>-1</sup> ]                        | see Figure 4 of the paper |              |             |               | see [1]                        | Generated    | Generated    |
| D <sub>ws</sub> [m <sup>2</sup> s <sup>-1</sup> ]                       | see Figure 6 of the paper |              |             |               |                                | WUFI         | WUFI         |

**Note:**  $\rho_{\text{hard}}$  – bulk density hardened state [kg m<sup>-3</sup>];  $P_0$  – open porosity by MIP [%];  $c_p$  – specific heat capacity [J kg<sup>-1</sup> K<sup>-1</sup>];  $\lambda_{10^\circ\text{C,dry}}$  – thermal conductivity at 10 °C and in dry-state [W m<sup>-1</sup> K<sup>-1</sup>];  $\mu$  – water vapour resistance factor [-];  $w_{80}$  – moisture content at 80%RH [kg m<sup>-3</sup>];  $w_f$  – free water saturation [kg m<sup>-3</sup>];  $A_w$  – capillary water absorption coefficient [kg m<sup>-2</sup> s<sup>-1/2</sup>];  $\lambda_w$  – thermal conductivity as a function of different moisture contents [W m<sup>-1</sup> K<sup>-1</sup>];  $D_{ws}$  – moisture diffusivity for suction [m<sup>2</sup> s<sup>-1</sup>].

**Table S2.** Properties of other materials used in the simulations

| Property                                                              | Finishing<br>coat<br>[2,6,7] | Basecoat<br>[2,6,8]  | Lwt concrete<br>block<br>[9–11] | Fired clay<br>hollow brick<br>[9–11] | Cement/sand<br>mortar<br>[9–12] | Gypsum<br>board<br>[5] | Interior<br>plaster<br>[5] |
|-----------------------------------------------------------------------|------------------------------|----------------------|---------------------------------|--------------------------------------|---------------------------------|------------------------|----------------------------|
| $\rho_{\text{hard}}$ [kg m <sup>-3</sup> ]                            | 1750 <sup>a</sup>            | 1250 <sup>a</sup>    | 700 <sup>a</sup>                | 654                                  | 1800                            | 730                    | 850                        |
| $P_0$ [%]                                                             | 20                           | 25                   | 70                              | 40                                   | 32                              | 72                     | 65                         |
| $c_p$ [J kg <sup>-1</sup> K <sup>-1</sup> ]                           | 1000                         | 1000                 | 850                             | 1000                                 | 890                             | 1384                   | 850                        |
| $\lambda_{10^\circ\text{C,dry}}$ [W m <sup>-1</sup> K <sup>-1</sup> ] | 0.8200 <sup>a</sup>          | 0.4500 <sup>a</sup>  | 0.2115 <sup>a</sup>             | 0.3800 <sup>a</sup>                  | 1.0000                          | 0.1925                 | 0.2000                     |
| $\mu$ [-]                                                             | 300                          | 12                   | 16                              | 17.5                                 | 20                              | 6.8                    | 8.3                        |
| $w_{80}$ [kg m <sup>-3</sup> ]                                        | <sup>b</sup>                 | -                    | 15                              | 15                                   | 50                              | 8.3                    | 6.3                        |
| $w_f$ [kg m <sup>-3</sup> ]                                           | <sup>b</sup>                 | -                    | 500                             | 80                                   | 283                             | 353                    | 400                        |
| $A_w$ [kg m <sup>-2</sup> s <sup>-1/2</sup> ]                         | <sup>b</sup>                 | < 0.026 <sup>a</sup> | -                               | 0.142                                | 0.300                           | 0.130                  | -                          |
| $\lambda_w$ [W m <sup>-1</sup> K <sup>-1</sup> ]                      | <sup>b</sup>                 | -                    | Generated                       |                                      |                                 |                        |                            |
| $D_{ws}$ [m <sup>2</sup> s <sup>-1</sup> ]                            | <sup>b</sup>                 | -                    |                                 |                                      |                                 |                        |                            |

**Note:** <sup>a</sup> – manufacturer data; <sup>b</sup> – assumed that the exterior coating had no hygroscopic behaviour [13,14];  $\rho_{\text{hard}}$  – bulk density hardened state [kg m<sup>-3</sup>];  $P_0$  – open porosity by MIP [%];  $c_p$  – specific heat capacity [J kg<sup>-1</sup> K<sup>-1</sup>];  $\lambda_{10^\circ\text{C,dry}}$  – thermal conductivity at 10 °C and in dry-state [W m<sup>-1</sup> K<sup>-1</sup>];  $\mu$  – water vapour resistance factor [-];  $w_{80}$  – moisture content at 80%RH [kg m<sup>-3</sup>];  $w_f$  – free water saturation [kg m<sup>-3</sup>];  $A_w$  – capillary water absorption coefficient [kg m<sup>-2</sup> s<sup>-1/2</sup>];  $\lambda_w$  – thermal conductivity as a function of different moisture contents [W m<sup>-1</sup> K<sup>-1</sup>];  $D_{ws}$  – moisture diffusivity for suction [m<sup>2</sup> s<sup>-1</sup>].

## 2. Wall assemblies

The constitution of the wall assemblies for new construction located in Lisbon (NW) can be seen in Table S3. As for the new construction located in Zurich (ZNW), their constitution can be seen in Table S4.

**Table S3.** New wall solutions for Lisbon (NW)

| Case | Layer 1 – exterior                            | Layer 2                         | Layer 3                           | Layer 4                           | Layer 5                         | U-value<br>[W m <sup>-2</sup> °C <sup>-1</sup> ] |
|------|-----------------------------------------------|---------------------------------|-----------------------------------|-----------------------------------|---------------------------------|--------------------------------------------------|
| NW1  |                                               | TR reference<br>(0.025 m)       |                                   |                                   |                                 | 0.473                                            |
| NW2  |                                               | TR aramid<br>(0.025 m)          |                                   |                                   |                                 | 0.475                                            |
| NW3  | Finishing coat<br>+<br>Basecoat<br>(0.0055 m) | TR sisal<br>(0.025 m)           | Lwt concrete<br>block<br>(0.25 m) | Interior<br>plaster<br>(0.02 m)   | -                               | 0.468                                            |
| NW4  |                                               | TR biomass<br>(0.025 m)         |                                   |                                   |                                 | 0.476                                            |
| NW5  |                                               | Ind thermal render<br>(0.040 m) |                                   |                                   |                                 | 0.484                                            |
| NW6  |                                               | EPS<br>(0.030 m)                | Basecoat<br>(0.003 m)             | Lwt concrete<br>block<br>(0.25 m) | Interior<br>plaster<br>(0.02 m) | 0.477                                            |
| NW7  |                                               | XPS<br>(0.025 m)                |                                   |                                   |                                 | 0.451                                            |

**Table S4.** New wall solutions for Zurich (ZNW)

| Case | Layer 1 – exterior                            | Layer 2                        | Layer 3                           | Layer 4                           | Layer 5                         | U-value<br>[W m <sup>-2</sup> °C <sup>-1</sup> ] |
|------|-----------------------------------------------|--------------------------------|-----------------------------------|-----------------------------------|---------------------------------|--------------------------------------------------|
| ZNW1 |                                               | TR reference<br>(0.06 m)       |                                   |                                   |                                 | 0.239                                            |
| ZNW2 |                                               | TR aramid<br>(0.06 m)          |                                   |                                   |                                 | 0.240                                            |
| ZNW3 | Finishing coat<br>+<br>Basecoat<br>(0.0055 m) | TR sisal<br>(0.06 m)           | Lwt concrete<br>block<br>(0.38 m) | Interior<br>plaster<br>(0.02 m)   | -                               | 0.236                                            |
| ZNW4 |                                               | TR biomass<br>(0.06 m)         |                                   |                                   |                                 | 0.240                                            |
| ZNW5 |                                               | Ind thermal render<br>(0.08 m) |                                   |                                   |                                 | 0.263                                            |
| ZNW6 |                                               | EPS<br>(0.07 m)                | Basecoat<br>(0.003 m)             | Lwt concrete<br>block<br>(0.38 m) | Interior<br>plaster<br>(0.02 m) | 0.244                                            |
| ZNW7 |                                               | XPS<br>(0.05 m)                |                                   |                                   |                                 | 0.244                                            |

For the retrofit scenarios, both located in Lisbon, their constitution is presented in Table S5 – when the thermal insulating material is placed on the external surface of an exterior wall – and in Table S6 – when the thermal insulating material is placed on the interior surface of an exterior wall.

**Table S5.** Retrofit solutions applied on the wall's external surface (RE)

| Case | Layer 1 – exterior      | Layer 2                          | Layer 3                            | Layer 4                          | Layer 5                   | Layer 6                          | Layer 7                   | U-value<br>[W m <sup>-2</sup> °C <sup>-1</sup> ] |
|------|-------------------------|----------------------------------|------------------------------------|----------------------------------|---------------------------|----------------------------------|---------------------------|--------------------------------------------------|
| RE1  | Painted mortar (0.02 m) | Fired clay hollow brick (0.11 m) | Air layer (0.03 m)                 |                                  | Interior plaster (0.02 m) | -                                | -                         | 1.076                                            |
| RE2  |                         | TR reference (0.04 m)            |                                    |                                  |                           |                                  |                           | 0.474                                            |
| RE3  |                         | TR aramid (0.04 m)               |                                    |                                  |                           |                                  |                           | 0.477                                            |
| RE4  | Finishing coat          | TR sisal (0.04 m)                | Mortar (0.02 m)                    | Fired clay hollow brick (0.11 m) |                           | Fired clay hollow brick (0.11 m) | Interior plaster (0.02 m) | 0.465                                            |
| RE5  | +                       | TR biomass (0.04 m)              |                                    |                                  | Air layer (0.03 m)        |                                  |                           | 0.478                                            |
| RE6  | Basecoat (0.0055 m)     | Ind thermal render (0.065 m)     |                                    |                                  |                           |                                  |                           | 0.488                                            |
| RE7  |                         | EPS (0.045 m)                    | Basecoat + Mortar (0.003 + 0.02 m) |                                  |                           |                                  |                           | 0.498                                            |
| RE8  |                         | XPS (0.04 m)                     |                                    |                                  |                           |                                  |                           | 0.441                                            |

**Table S6.** Retrofit solutions applied on the wall's internal surface (RI)

| Case | Layer 1 – exterior      | Layer 2                          | Layer 3            | Layer 4                          | Layer 5                   | Layer 6                      | Layer 7                 | U-value<br>[W m <sup>-2</sup> °C <sup>-1</sup> ] |
|------|-------------------------|----------------------------------|--------------------|----------------------------------|---------------------------|------------------------------|-------------------------|--------------------------------------------------|
| RI1  |                         |                                  |                    |                                  |                           | -                            | -                       | 1.076                                            |
| RI2  |                         |                                  |                    |                                  |                           | TR reference (0.035 m)       |                         | 0.496                                            |
| RI3  |                         |                                  |                    |                                  |                           | TR aramid (0.035 m)          |                         | 0.499                                            |
| RI4  |                         |                                  |                    |                                  |                           | TR sisal (0.035 m)           |                         | 0.488                                            |
| RI5  | Painted mortar (0.02 m) | Fired clay hollow brick (0.11 m) | Air layer (0.03 m) | Fired clay hollow brick (0.11 m) | Interior plaster (0.02 m) | TR biomass (0.035 m)         | Gypsum board (0.0125 m) | 0.500                                            |
| RI6  |                         |                                  |                    |                                  |                           | Ind thermal render (0.060 m) |                         | 0.496                                            |
| RI7  |                         |                                  |                    |                                  |                           | EPS (0.040 m)                |                         | 0.500                                            |
| RI8  |                         |                                  |                    |                                  |                           | XPS (0.035 m)                |                         | 0.431                                            |

### 3. Graphical results of the hygrothermal simulations

The next Figures graphically show the hygrothermal simulation results that were presented in the paper. This presentation is expected to help the reader to better understand the differences that were identified between the different adopted constructive solutions, as well as the impact that different climates have on the hygrothermal performance of the materials.

To further help to identify the different simulation scenarios, it is shown in Figure S1 how they were organized.

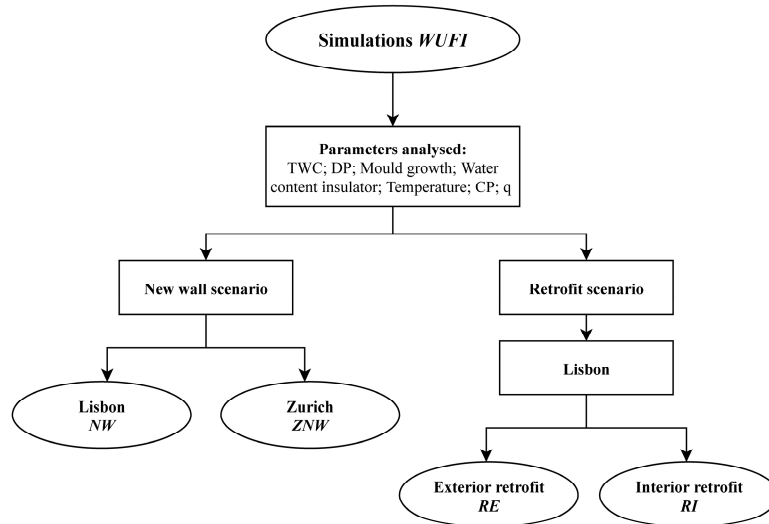

**Figure S1.** Flowchart of the conducted hygrothermal simulations

### 3.1 New wall scenario (NW and ZNW)

The following Figures (Figure S2 to Figure S8) represent the most significant results that were obtained for the new wall scenario, for both Lisbon (NW) and Zurich (ZNW) and how they compare.

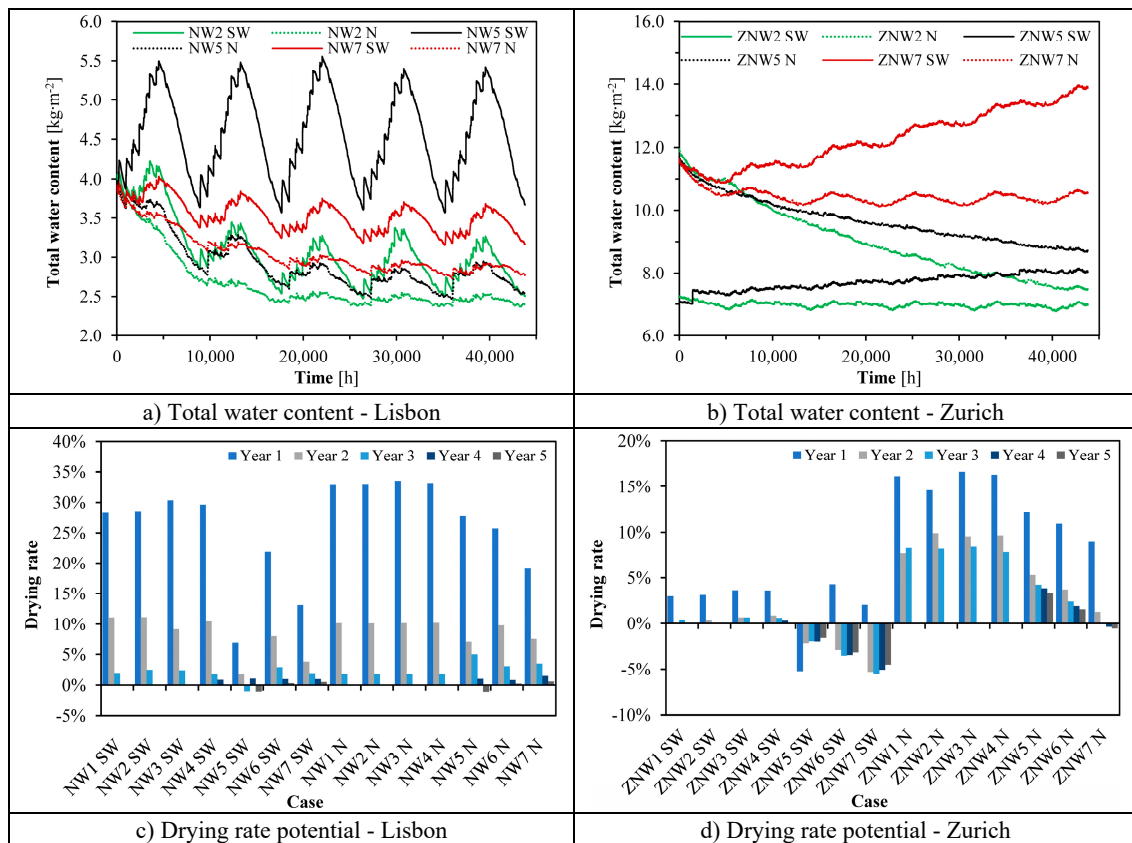

**Figure S2.** Total water content and drying rates for Lisbon (NW) and Zurich (ZNW)

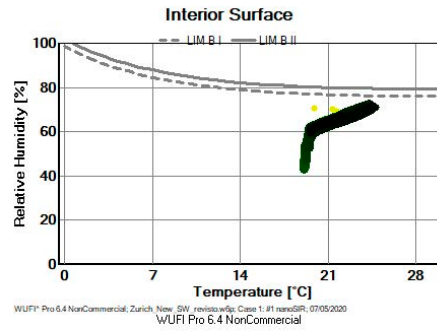

Figure S3. Isoleth example for the ZNW1 solution

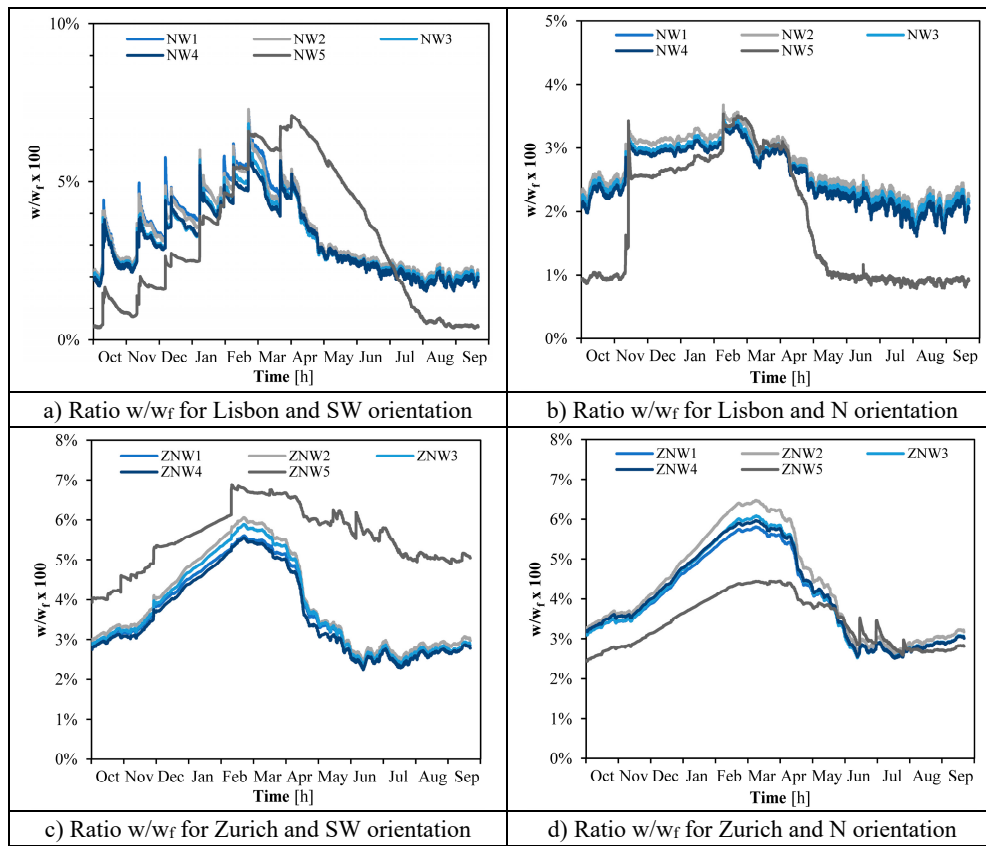

Figure S4. Ratio of water content to  $w_f$  for the renders

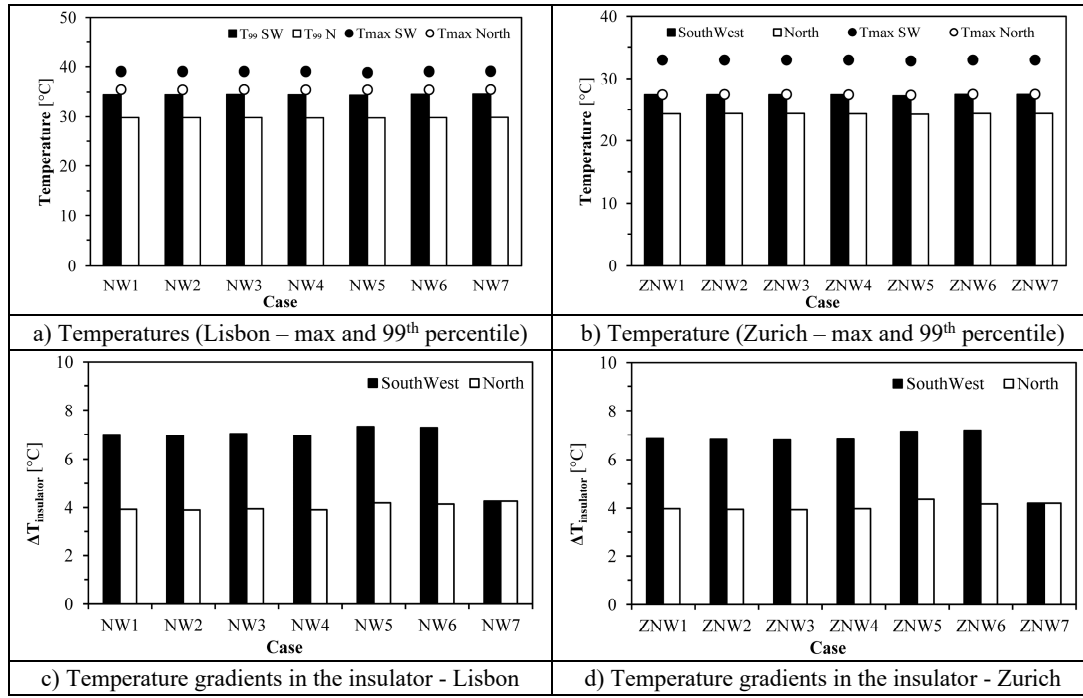

Figure S5. Temperatures verified for the different solutions

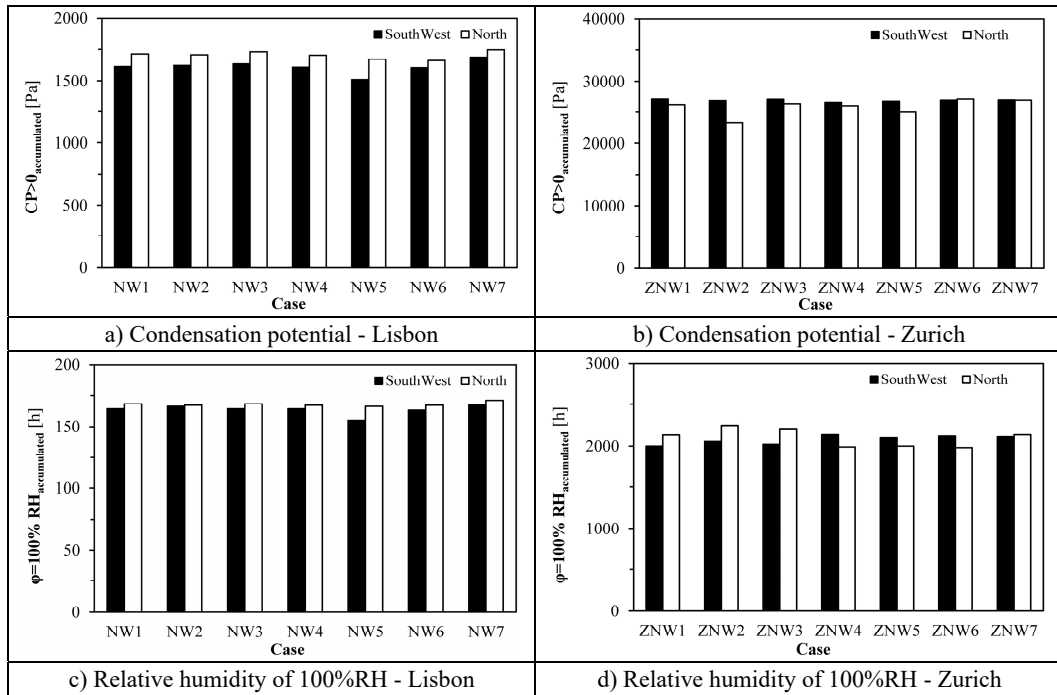

Figure S6. Superficial condensation potential

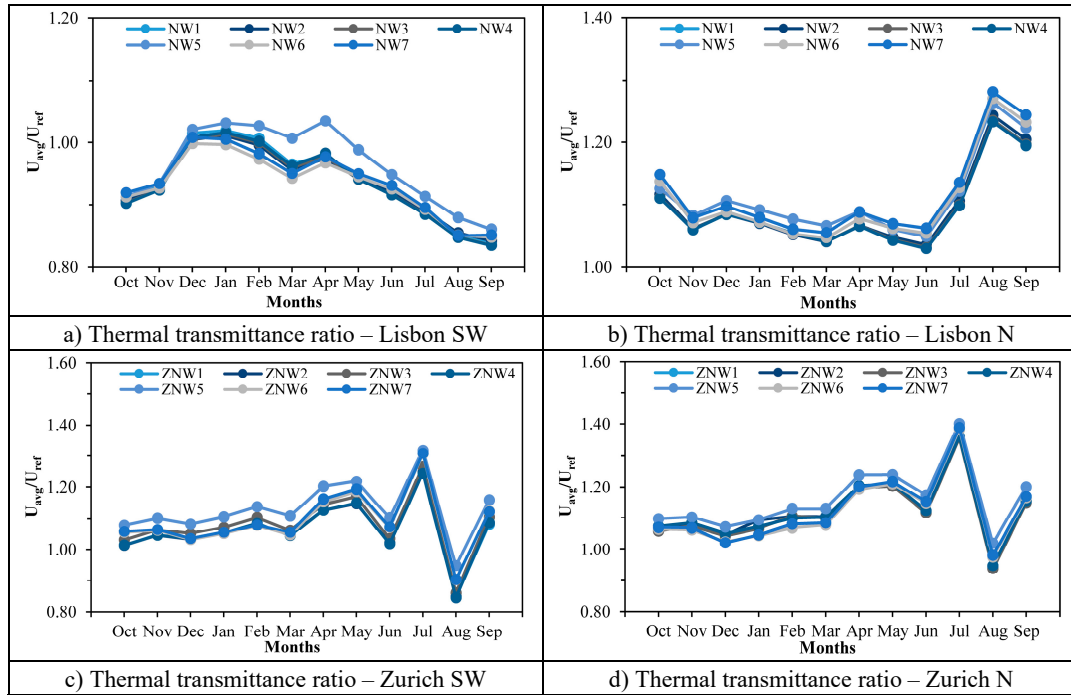

**Figure S7.** Thermal insulation losses over the reference performance during the year

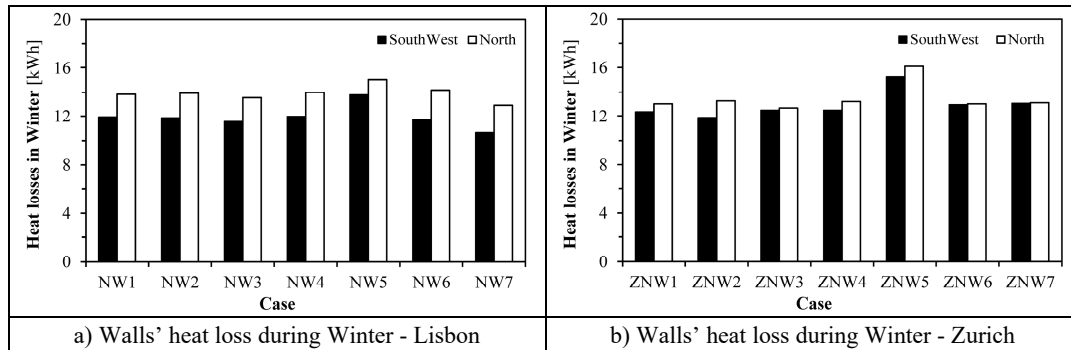

**Figure S8.** Heat loss during Winter per square meter of wall

### 3.2 Exterior retrofit of the thermal insulation (RE)

The following Figures (Figure S9 to Figure S15) represent the most significant results that were obtained for the exterior retrofit scenario, located in Lisbon (RE).

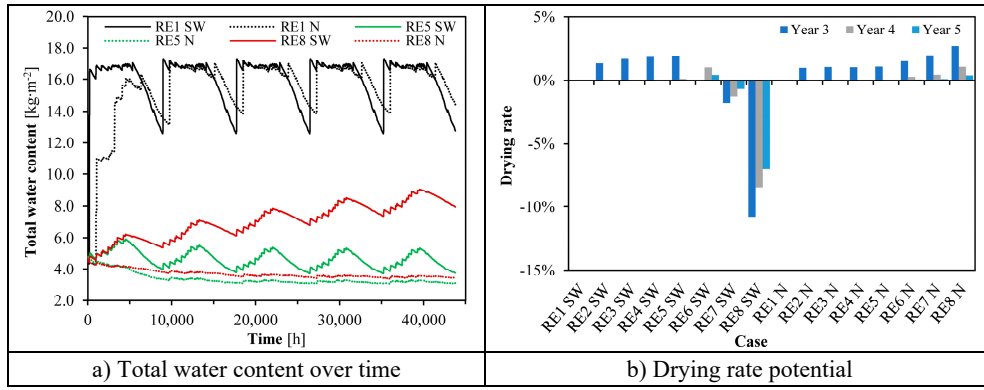

Figure S9. Total water content and drying rates of the solutions (RE scenario)

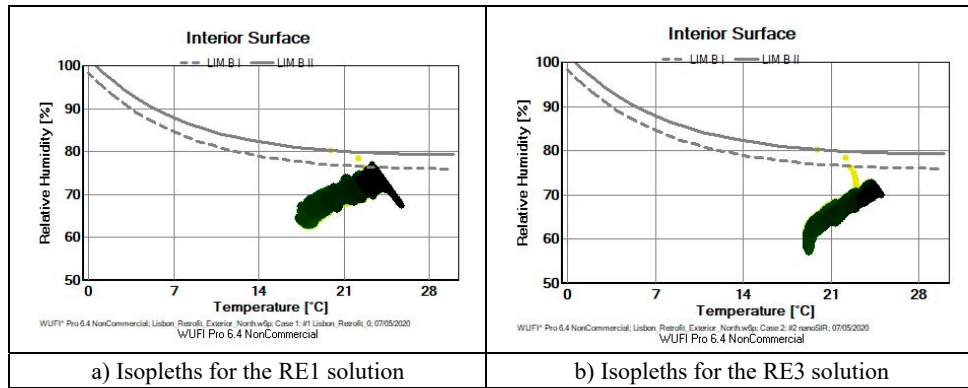

Figure S10. Mould growth potential

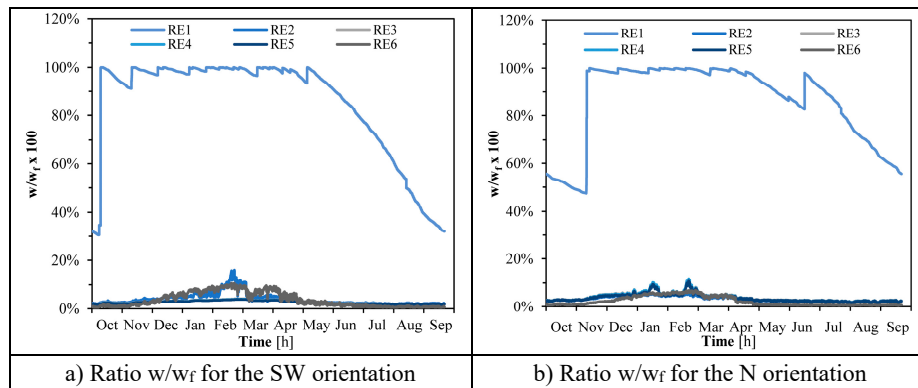

Figure S11. Ratio of water content to w<sub>f</sub> for the renders

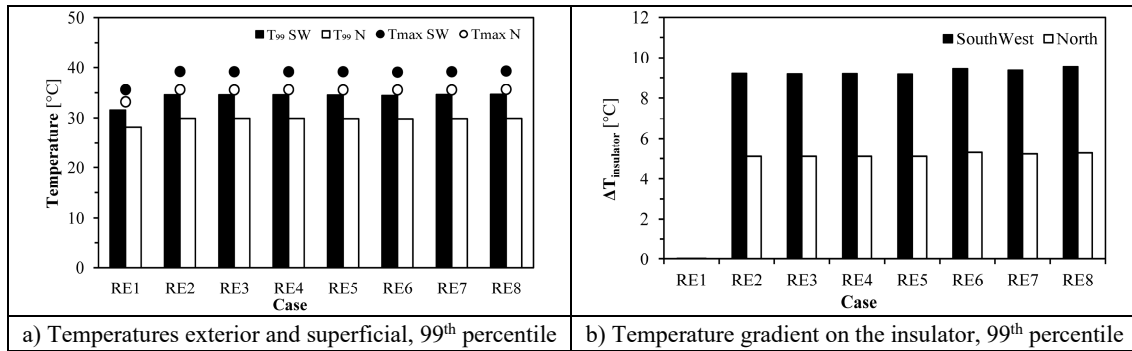

Figure S12. Temperatures verified in the simulation



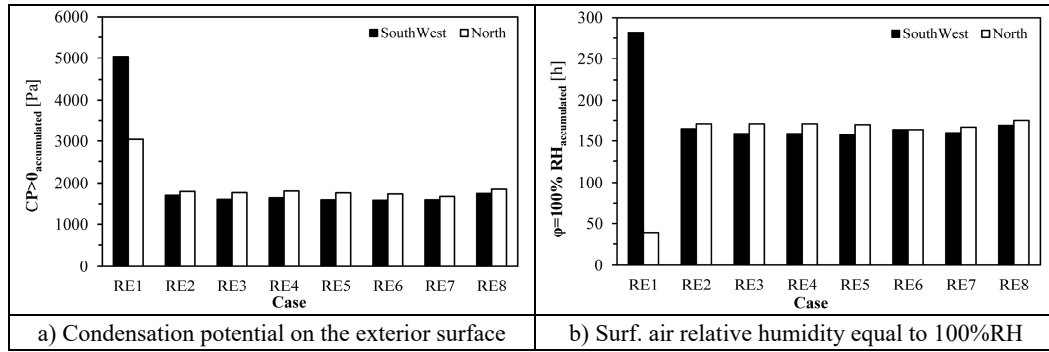

Figure S13. Conditions for formation of superficial condensation

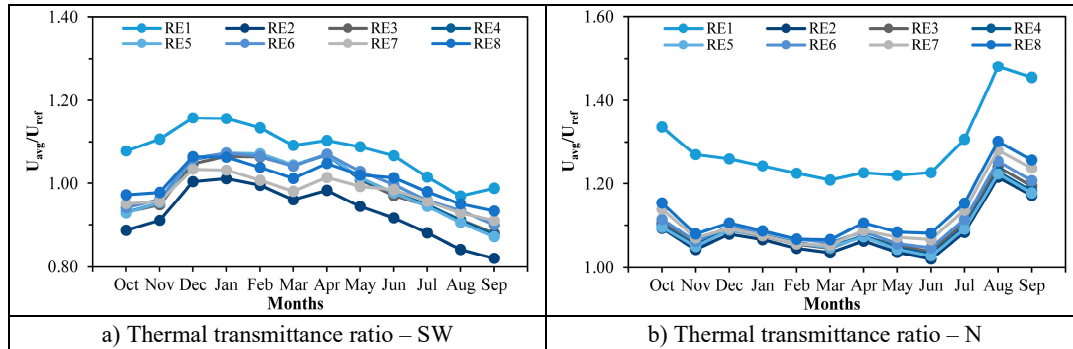

Figure S14. Thermal insulation loss over the year

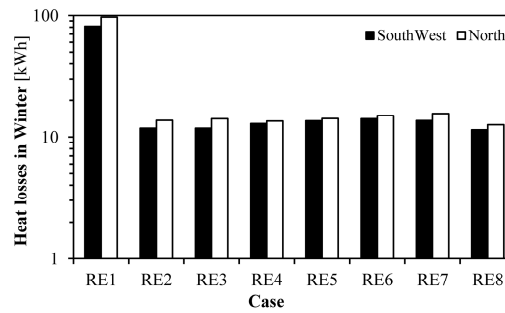

Figure S15. Heat loss during Winter, per square meter of wall

### 3.3 Interior retrofit of the thermal insulation (RI)

The following Figures (Figure S16 to Figure S21) represent the most significant results that were obtained for the interior retrofit scenario, located in Lisbon (RI).

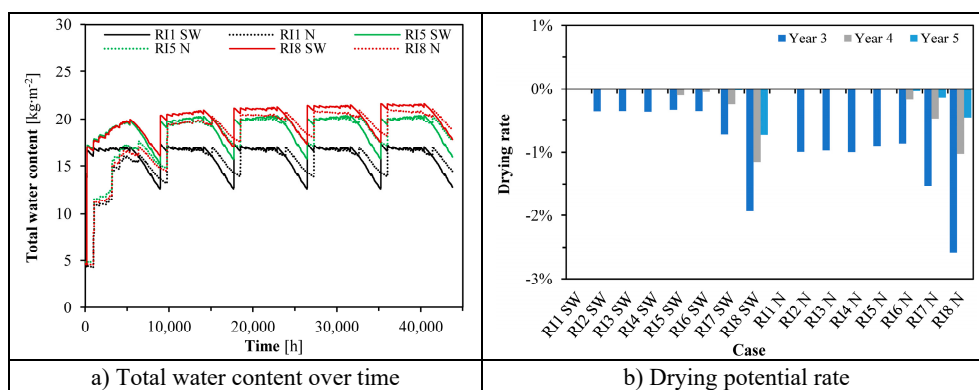

Figure S16. Total water content and drying potential rate

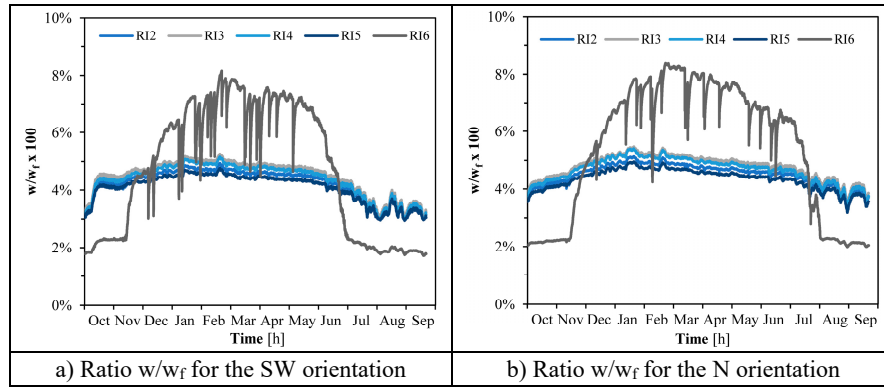

**Figure S17.** Ratio of water content to  $w_f$  for the renders

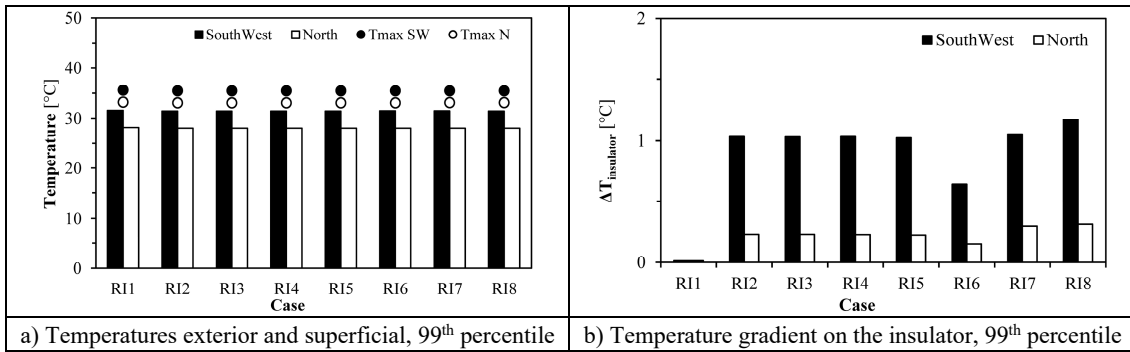

**Figure S18.** Temperatures verified in the simulation

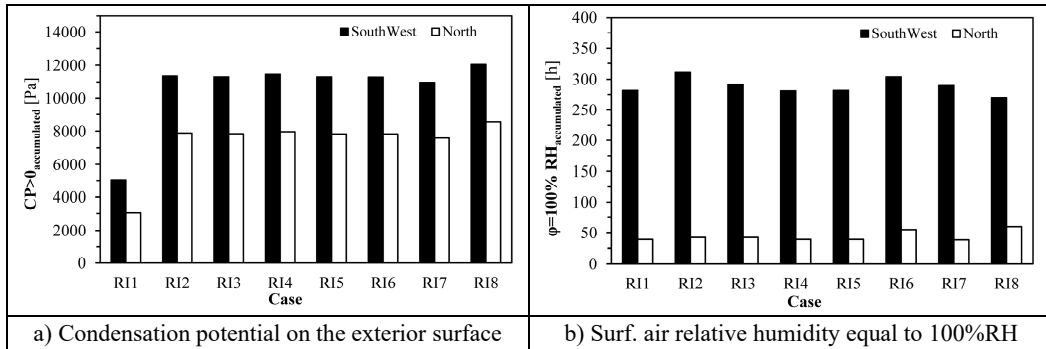

**Figure S19.** Verification of the conditions for the formation of superficial condensation

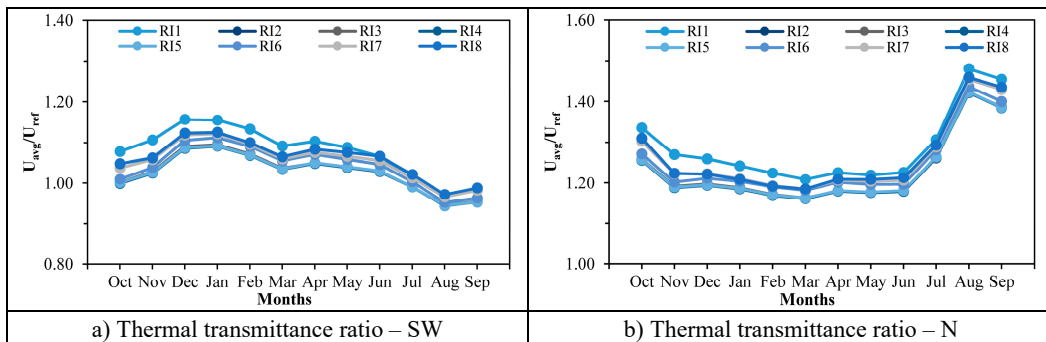

**Figure S20.** Thermal insulation loss over the year

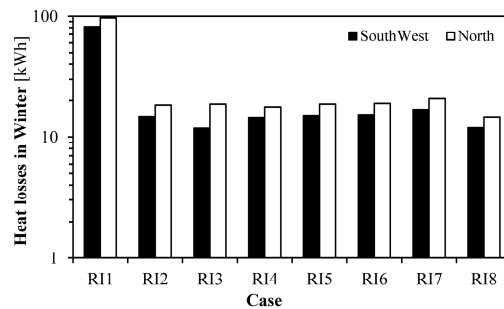

**Figure S21.** Heat loss during Winter, per square meter of wall

## References

- [1] J. Maia, N.M.M. Ramos, R. Veiga, Evaluation of the hygrothermal properties of thermal rendering systems, *Build. Environ.* 144 (2018) 437–449. doi:10.1016/j.buildenv.2018.08.055.
- [2] J.F. Maia, *Durability of Thermal Rendering and Plastering Systems*, University of Porto, 2019.
- [3] L. Ducoulombier, Z. Lafhaj, Comparative study of hygrothermal properties of five thermal insulation materials, *Case Stud. Therm. Eng.* 10 (2017) 628–640. doi:10.1016/j.csite.2017.11.005.
- [4] S. Schiavoni, F. D'Alessandro, F. Bianchi, F. Asdrubali, Insulation materials for the building sector: A review and comparative analysis, *Renew. Sustain. Energy Rev.* 62 (2016) 988–1011. doi:10.1016/j.rser.2016.05.045.
- [5] Fraunhofer - IBP, WUFI Pro 5.0, Holzirchen, Germany, 2009.
- [6] M. Pedroso, I. Flores-Colen, J.D. Silvestre, M.G. Gomes, L. Silva, P. Sequeira, J. de Brito, Characterisation of a multilayer external wall thermal insulation system. Application in a Mediterranean climate, *J. Build. Eng.* 30 (2020) 101265. doi:10.1016/j.job.2020.101265.
- [7] Saint-Gobain Weber, Technical datasheet: Weberplast decor plus (in Portuguese), 2019.
- [8] Saint-Gobain Weber, Technical datasheet: Webertherm pro (in Portuguese), 2019.
- [9] CEN, EN 12524 - Building materials and products - Hygrothermal properties - Tabulated design values, Comité Européen de Normalisation, Belgium, 2000.
- [10] CEN, EN 1745: Masonry and masonry products — Methods for determining thermal properties, Comité Européen de Normalisation, Belgium, 2012.
- [11] M.K. Kumaran, Heat, Air, and Moisture Transfer in Insulated Envelope Parts. Final report. Task 3: Material properties, Canada, 1996.
- [12] ISO/TC 163/SC 2, ISO 10456: 2007 - Building materials and products - Hygrothermal properties - Tabulated design values and procedures for determining declared and design thermal values, ISO, Switzerland, 2007.
- [13] E. Barreira, V.P. de Freitas, External Thermal Insulation Composite Systems: Critical Parameters for Surface Hygrothermal Behaviour, *Adv. Mater. Sci. Eng.* 2014 (2014) 1–16. doi:10.1155/2014/650752.
- [14] J.M.P.Q. Delgado, E. Barreira, N.M.M. Ramos, V.P. de Freitas, *Hygrothermal Numerical Simulation Tools Applied to Building Physics*, Springer Berlin Heidelberg, Berlin, Heidelberg, 2013. doi:10.1007/978-3-642-35003-0.
